# Supplementary material
Source: Springer Nature journal article supplement (https://www.springermedizin.de/resource/supplementary/12889_2010_3320_MOESM2_ESM.pdf/9488890)
Supplement: MOESM2 [file 9488890]

Search of MEDLINE, EMBASE, PsycINFO, CINAHL and Dissertation Abstracts International:  
**5628 titles and abstracts**

Titles and abstract that did not relate to the attitudes of pharmacists and general public towards pharmaceutical public health:  
**5506 titles and abstracts**

Assessment of titles and abstracts led to **122 full text papers** being obtained that met inclusion criteria or for which there was insufficient detail to assess inclusion.

Full papers that did not relate to the attitudes of pharmacists and general public towards pharmaceutical public health:  
**59 full text papers**

The reference lists of 63 remaining full text papers were searched and a further 5 studies were identified for inclusion:  
**68 full text papers**

Assessment of full text papers by second researcher (RO) resulted in exclusion of 1 paper as the population did not meet the inclusion criteria.

**63 studies in 67 papers included in review.**
